# Supplementary material for: A Prospective Feasibility Trial to Challenge Patient–Derived Pancreatic Cancer Organoids in Predicting Treatment Response
Source: MDPI journal article supplement (doi:10.3390/cancers13112539), 2021-05-21
Supplement: s1 [file s1]

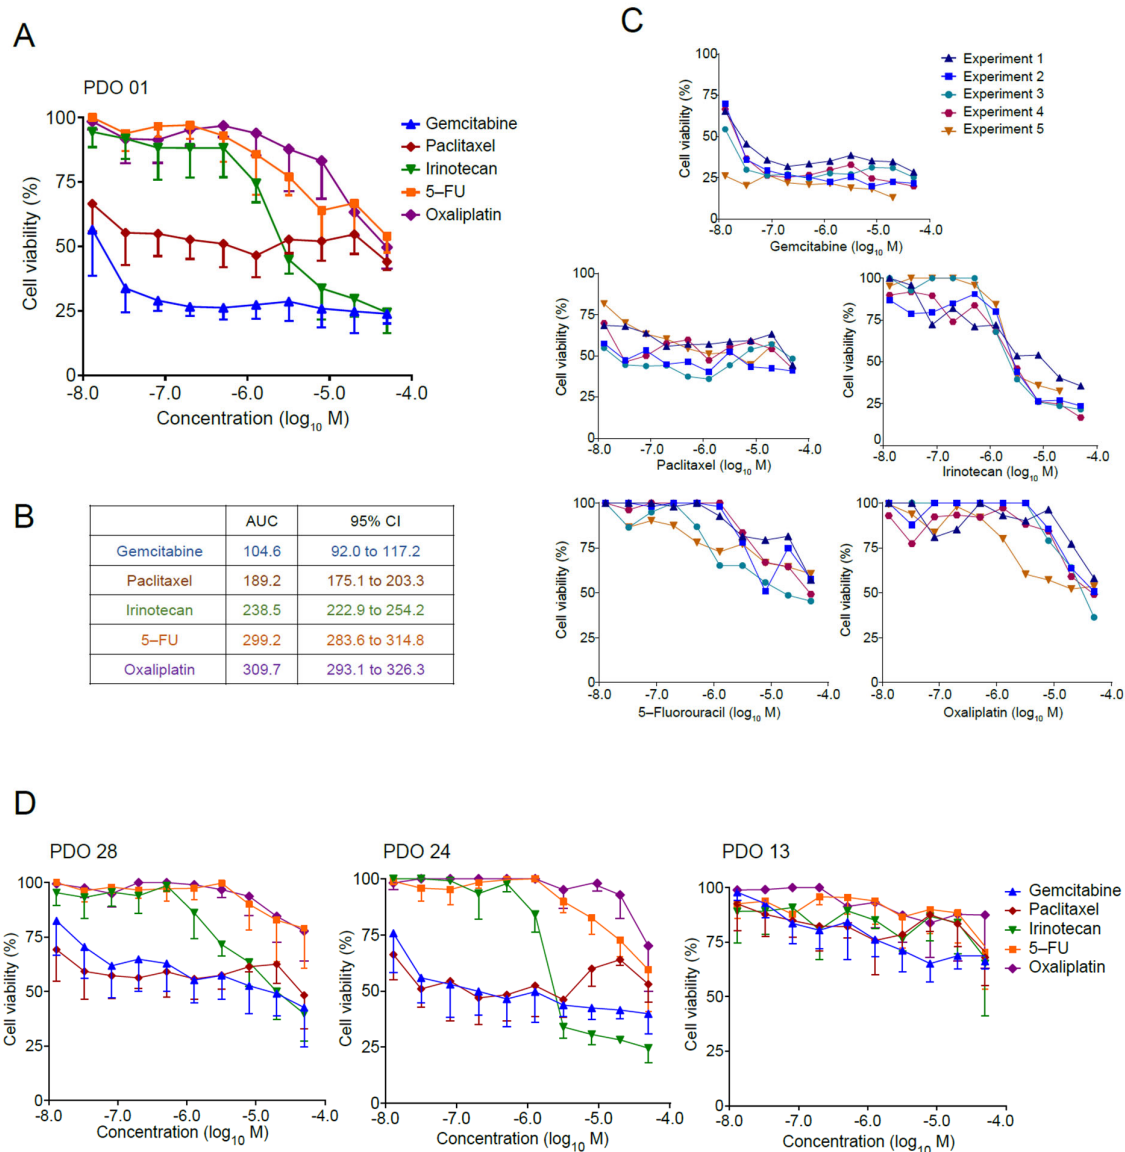

**Supplementary Figure S1. PDO pharmacotyping is a reliable method.**

(A), Cell viability analysis of gemcitabine, paclitaxel, irinotecan, 5-fluorouracil (5-FU), and oxaliplatin treatment in patient-derived organoid (PDO) line 01. Data are represented as mean  $\pm$  SD of five independent experiments performed by four experimenters. (B), Areas under the curves and 95% confidence intervals (CI) of the cell viability analysis shown in A. (C), Independent cell viability assays of gemcitabine, paclitaxel, irinotecan, 5-FU, and oxaliplatin treatment in patient-derived organoid line 01 used for the viability analysis shown in A. (D), Cell viability analysis of gemcitabine, paclitaxel, irinotecan, 5-FU, and oxaliplatin treatment in patient-derived organoid lines 28, 24, and 13. Data are represented as mean  $\pm$  SD of three independent experiments. CI, confidence interval; SD; standard deviation; AUC, area under the curve; PDO, patient-derived organoids.

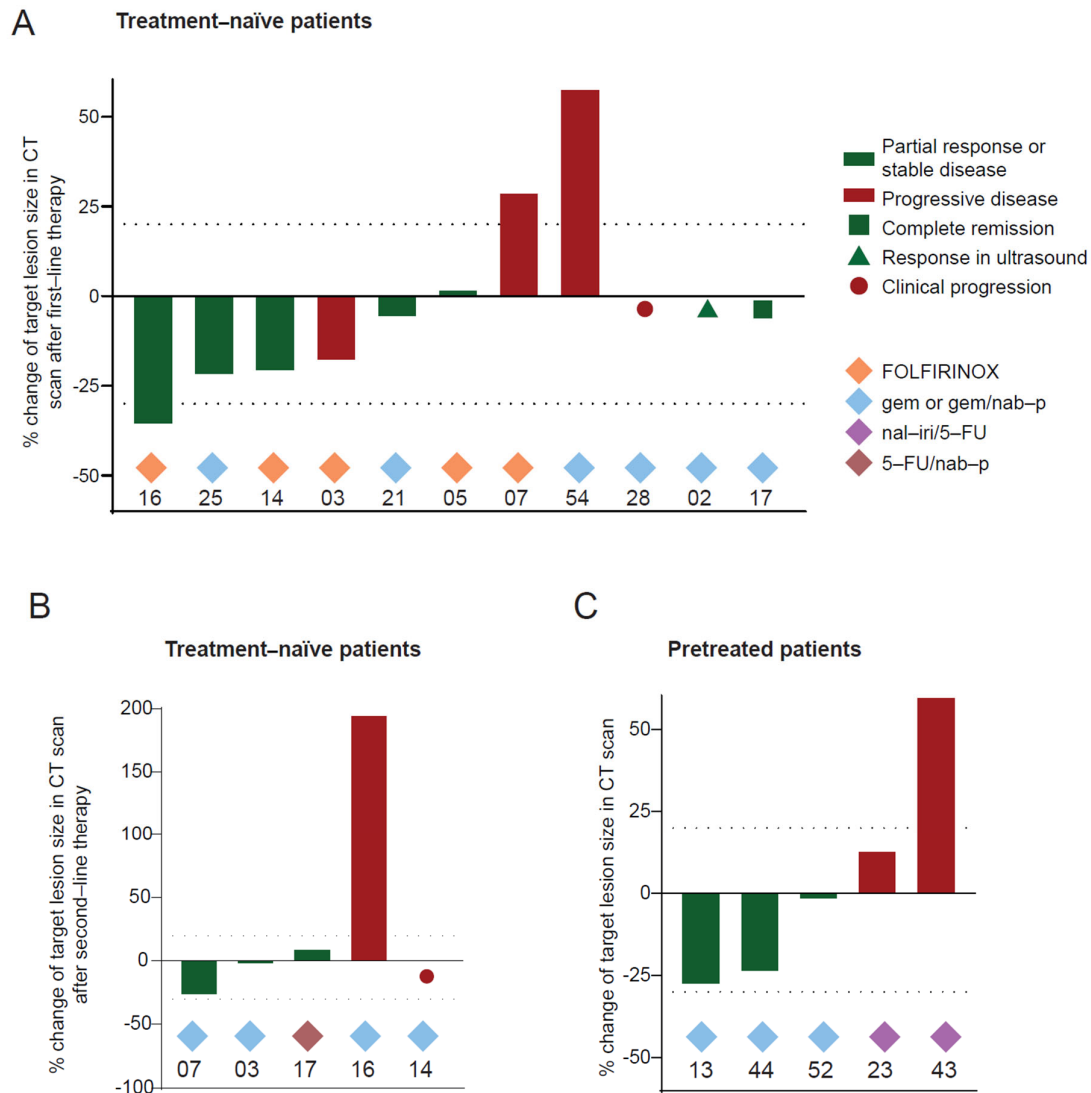

**Supplementary Figure S2. Change of target lesion size upon chemotherapy treatment.**

Waterfall plot showing percentage change in target lesion size in restaging CT scan based on RECIST 1.1 criteria, (A), after first-line treatment and (B), after second-line treatment in treatment-naïve patients. (C), Waterfall plot showing change in target lesion size in CT scan based on RECIST 1.1 criteria after subsequent treatment in pretreated patients. CT, computed tomography; FOLFIRINOX, 5-fluorouracil, leucovorin, irinotecan, and oxaliplatin; GEM/nab-p, gemcitabine, and nanoparticle albumin-bound paclitaxel; nal-iri/5-FU, nanoliposomal irinotecan, 5-fluorouracil, and leucovorin; 5-FU/nab-p, 5-fluorouracil, leucovorin, and nanoparticle albumin-bound paclitaxel; RECIST, Response Evaluation Criteria In Solid Tumors.

A

Response from FOLFIRINOX-SVM:  
 $-5.27 \times \text{AUC}_{\text{IRI}} - 16.15 \times \text{AUC}_{\text{SFU}} - 16.38 \times \text{AUC}_{\text{OX}} + 11519.14 > 0$

Response from Gem/nab-p-SVM:  
 $-9.575 \times \text{AUC}_{\text{GEM}} + 14.10279 \times \text{AUC}_{\text{PAC}} - 558.7679 > 0$

B

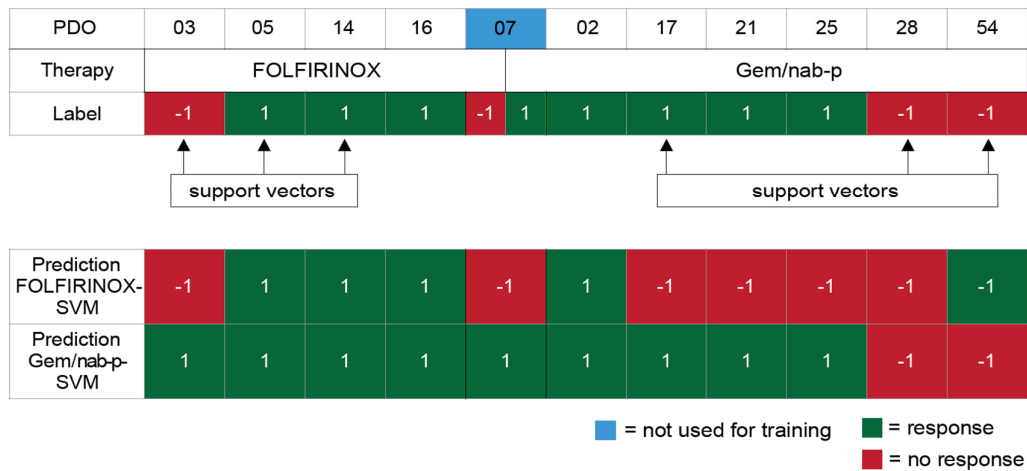

**Supplementary Figure S3. Machine learning classifier for prediction of treatment success.**

(A), Formular to determine response from FOLFIRINOX and Gem/nab-p support vector machines (SVM) based on the areas under curves (AUCs) for the single drugs as indicated. (B), Two linear SVMs were each trained on the AUCs of untreated 11 PDOs, labeled response (green) and no response (red) according to the patients' treatment outcome. Prediction of FOLFIRINOX and Gem/nab-p-SVM as indicated (response (green), no response (red)). The performance of the classifier was tested on an independent sample (PDO 07), correctly predicting treatment outcome. FOLFIRINOX, 5-fluorouracil, leucovorin, irinotecan, and oxaliplatin; Gem/nab-p, gemcitabine and nanoparticle albumin-bound paclitaxel; AUC, area under the curve; SVM, support vector machine.

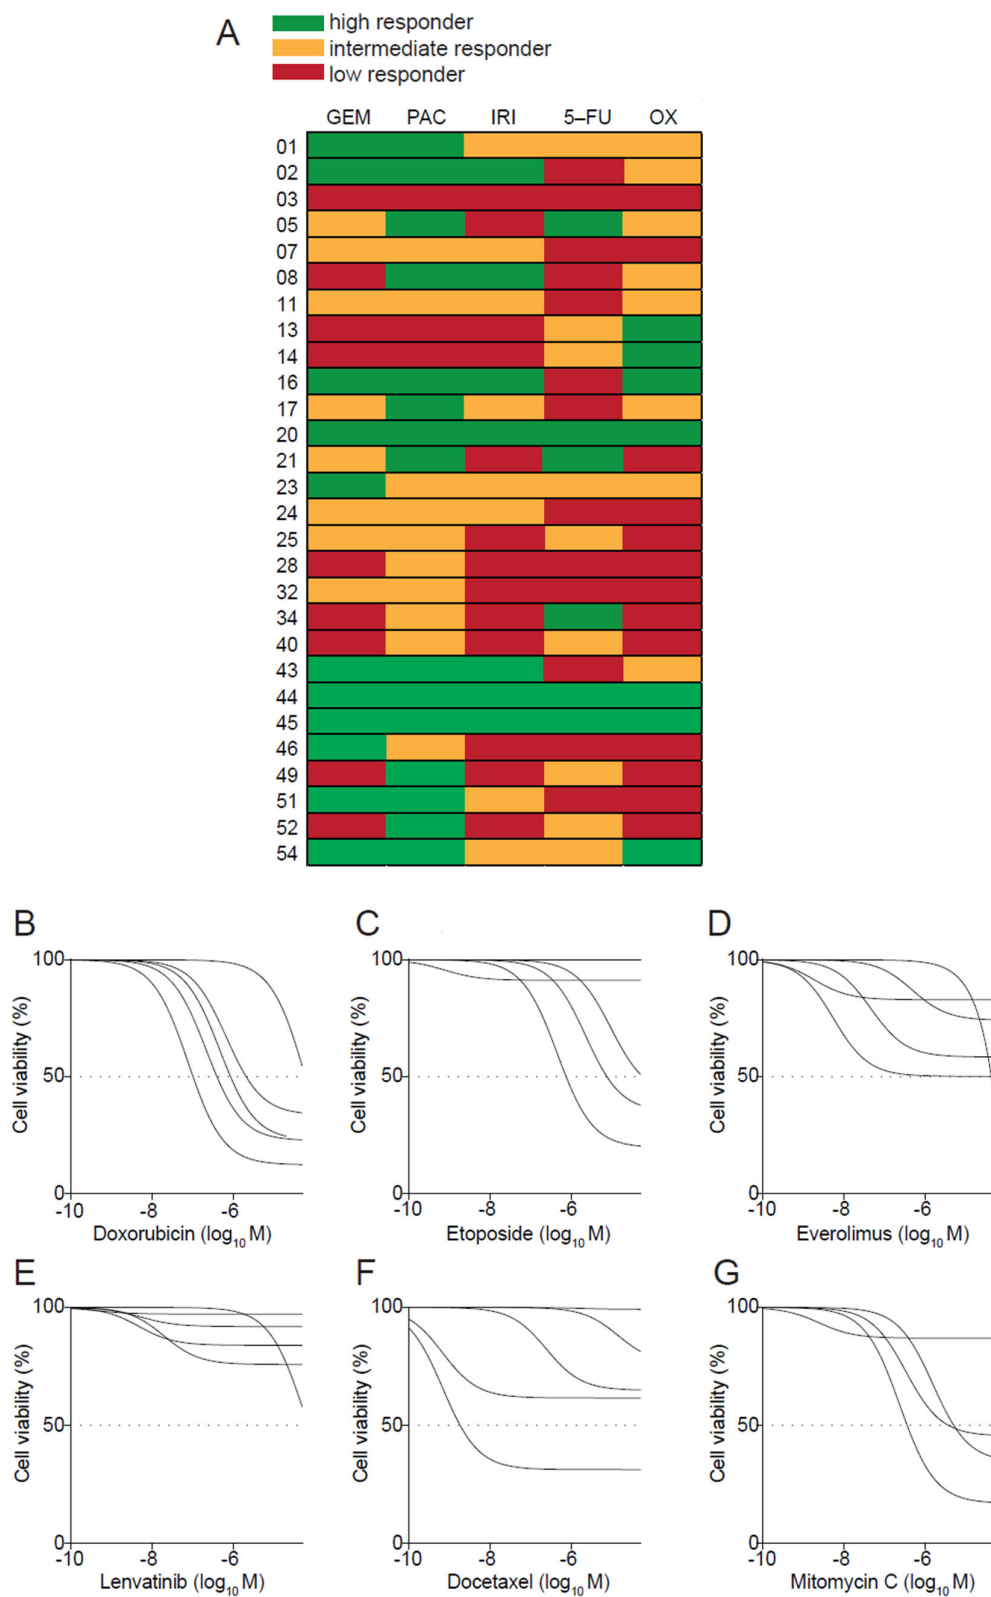

**Supplementary Figure S4. Subgrouping of the PDO library.**

(A), Classification into three subgroups (high responder (green), intermediate responder (orange), and low responder (red)) of all tested PDO lines, based on AUC clustering by the Jenks natural breaks

classification method. (**B-G**), Cell viability analysis of (**B**), doxorubicin (**C**), etoposide (**D**), everolimus (**E**), lenvatinib (**F**), docetaxel, and (**G**), mitomycin C treatment in PDOs. 5-FU, 5-fluorouracil; GEM, gemcitabine; IRI, irinotecan; OX, oxaliplatin; PAC, paclitaxel; PDO, patient-derived organoids.

|                                                      |           |
|------------------------------------------------------|-----------|
| <b>Patients' samples for pharmacotyping, no.</b>     | <b>54</b> |
| <b>Final diagnosis of pancreatic masses, no. (%)</b> |           |
| <i>Malignant epithelial tumors of the pancreas</i>   |           |
| Ductal adenocarcinoma, G1–3                          | 41 (76)   |
| Undifferentiated anaplastic carcinoma, G4            | 1 (2)     |
| Squamous cell carcinoma                              | 1 (2)     |
| Acinar cell carcinoma, G2                            | 1 (2)     |
| <i>Pancreatic neuroendocrine neoplasms</i>           |           |
| Neuroendocrine tumor, G1 or 2                        | 3 (6)     |
| Neuroendocrine carcinoma, G3                         | 1 (2)     |
| <i>Benign tumors</i>                                 |           |
| Serous cystadenoma                                   | 1 (2)     |
| <i>Other tumor entities</i>                          |           |
| T-cell non-hodgkin lymphoma                          | 1 (2)     |
| <i>No diagnostic tissue or necrosis</i>              | 4 (7)     |

**Supplementary Table S1. Patients' samples submitted to pharmacotyping.**

No, number; G, grade.

| PDO | Age | Sex    | ECOG | Stage            | Sampling | Biopsy           | Histology                      | Prior therapy lines | Treatment after PDO generation | Staging | PFS (days) |
|-----|-----|--------|------|------------------|----------|------------------|--------------------------------|---------------------|--------------------------------|---------|------------|
| 1   | 49  | male   | 1    | metastasized     | US       | liver metastasis | ductal adenocarcinoma          | 2                   | none                           | n/a     | n/a        |
| 2   | 69  | male   | 2    | metastasized     | US       | liver metastasis | ductal adenocarcinoma          | 0                   | Gem/nab-p                      | SD      | 70         |
| 3   | 42  | male   | 0    | metastasized     | US       | liver metastasis | ductal adenocarcinoma          | 0                   | FOLFIRINOX                     | PD      | 50         |
| 5   | 65  | male   | 1    | metastasized     | US       | liver metastasis | ductal adenocarcinoma          | 0                   | FOLFIRINOX                     | SD      | 72         |
| 7   | 41  | male   | 0    | metastasized     | US       | liver metastasis | ductal adenocarcinoma          | 0                   | FOLFIRINOX                     | PD      | 46         |
| 8   | 76  | female | 1    | metastasized     | US       | liver metastasis | ductal adenocarcinoma          | 0                   | none                           | n/a     | n/a        |
| 11  | 77  | male   | 1    | locally advanced | US       | primary tumor    | ductal adenocarcinoma, G1      | 0                   | Radiotherapy                   | n/a     | n/a        |
| 13  | 67  | female | 0    | metastasized     | US       | liver metastasis | ductal adenocarcinoma          | 4                   | Gem/nab-p                      | SD      | n/r        |
| 14  | 63  | male   | 0    | metastasized     | US       | liver metastasis | ductal adenocarcinoma          | 0                   | FOLFIRINOX                     | SD      | 174        |
| 16  | 53  | female | 0    | metastasized     | US       | primary tumor    | ductal adenocarcinoma, G3      | 0                   | FOLFIRINOX                     | PR      | 141        |
| 17  | 76  | female | 0    | resectable       | surgery  | primary tumor    | ductal adenocarcinoma, G2      | 0                   | Adj. gemcitabine               | CR      | 156        |
| 20  | 57  | female | 2    | metastasized     | US       | liver metastasis | ductal adenocarcinoma          | 0                   | FOLFIRINOX                     | n/a     | n/a        |
| 21  | 69  | female | 0    | locally advanced | US       | primary tumor    | ductal adenocarcinoma, G2-3    | 0                   | Gem/nab-p                      | SD      | 365, n/r   |
| 23  | 58  | male   | 0    | metastasized     | US       | liver metastasis | ductal adenocarcinoma          | 2                   | Nal-iri/5-FU                   | PD      | 92         |
| 24  | 41  | male   | 1    | metastasized     | US       | liver metastasis | ductal adenocarcinoma          | 2                   | Docetaxel/Oxaliplatin          | PD      | 64         |
| 25  | 61  | male   | 0    | metastasized     | US       | liver metastasis | ductal adenocarcinoma          | 0                   | Gem/nab-p                      | SD      | 196        |
| 28  | 77  | female | 0    | metastasized     | EUS      | primary tumor    | ductal adenocarcinoma          | 0                   | Gem/nab-p                      | PD      | 37         |
| 32  | 77  | female | 1    | resectable       | surgery  | primary tumor    | ductal adenocarcinoma, G2      | 0                   | none                           | n/a     | n/a        |
| 34  | 59  | male   | 1    | metastasized     | US       | liver metastasis | ductal adenocarcinoma          | 2                   | none                           | n/a     | n/a        |
| 40  | 57  | male   | 0    | resectable       | EUS      | primary tumor    | ductal adenocarcinoma, G2      | 0                   | none                           | n/a     | n/a        |
| 43  | 61  | male   | 1    | metastasized     | US       | liver metastasis | ductal adenocarcinoma          | 1                   | Nal-iri/5-FU                   | PD      | 56         |
| 44  | 45  | female | 0    | metastasized     | US       | liver metastasis | ductal adenocarcinoma          | 1                   | Gem/nab-p                      | SD      | n/r        |
| 45  | 69  | male   | 1    | metastasized     | US       | liver metastasis | ductal adenocarcinoma          | 0                   | none                           | n/a     | n/a        |
| 46  | 63  | female | 0    | metastasized     | US       | liver metastasis | ductal adenocarcinoma          | 1                   | Olaparib                       | n/a     | n/a        |
| 49  | 66  | female | 0    | resectable       | surgery  | primary tumor    | ductal adenocarcinoma, G1      | 0                   | FOLFIRINOX adjuvant            | n/a     | n/a        |
| 51  | 81  | male   | 0    | metastasized     | US       | liver metastasis | squamous cell carcinoma        | 0                   | FOLFOX                         | n/a     | n/a        |
| 52  | 70  | male   | 0    | metastasized     | US       | liver metastasis | ductal adenocarcinoma          | 1                   | Gem/nab-p                      | SD      | n/r        |
| 54  | 64  | male   | 1    | metastasized     | US       | liver metastasis | undifferentiated carcinoma, G4 | 0                   | Gem/nab-p                      | PD      | 47         |

**Supplementary Table S2. Overview of pharmacotyped patient cohort with regard to baseline characteristics, histology, prior therapy lines, therapy initiated after PDO isolation, staging, and PFS.** PDO, patient-derived organoid; PFS, progression-free survival; 5-FU, 5-fluorouracil; EUS, endoscopic ultrasound; US, ultrasound; FOLFIRINOX, 5-fluorouracil, leucovorin, irinotecan, and oxaliplatin; FOLFOX, 5-fluorouracil, leucovorin, and oxaliplatin; GEM, gemcitabine; Nal-iri, nanoliposomal irinotecan; PAC, paclitaxel; CR, complete response; PD, progressive disease; PR, partial response; SD, stable disease; n/a, not available; n/r, not reached.
